# Supplementary material for: Vapor-phase hydrothermal construction of defective MoS2 for highly selective electrocatalytic hydrogenation of cinnamaldehyde
Source: Royal Society of Chemistry journal article supplement (doi:10.1039/d2ma00842d), 2022-01-01
Supplement: d2ma00842d1.pdf [file d2ma00842d1.pdf]

## Supplementary Information

# Vapor-phase hydrothermal construction of defective MoS<sub>2</sub> for highly selective electrocatalytic hydrogenation of cinnamaldehyde

Tianxing Wu, <sup>\*a</sup> Miaomiao Han<sup>\*b</sup>

<sup>a</sup> Northwest Institute for Non-ferrous Metal Research, Xi'an, 710016, P. R. China

<sup>b</sup> School of Science, Huzhou University, Huzhou, 313000, P. R. China

\*Corresponding author.

E-mail addresses: mybestteacher@163.com (T. Wu)

mmhan@zjhu.edu.cn (M. Han)

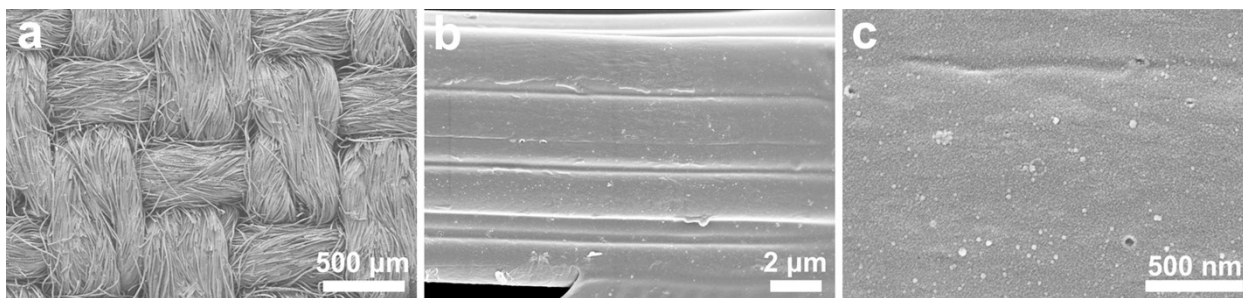

**Fig. S1** SEM images of bare CFC.

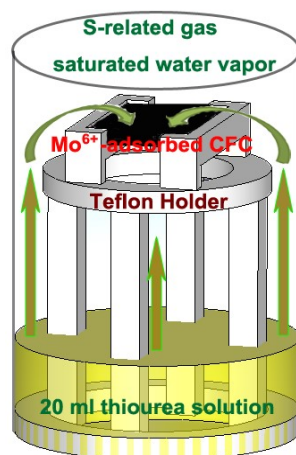

**Fig. S2** Experimental set up of vapor-phase hydrothermal (VPH) method used in this work.

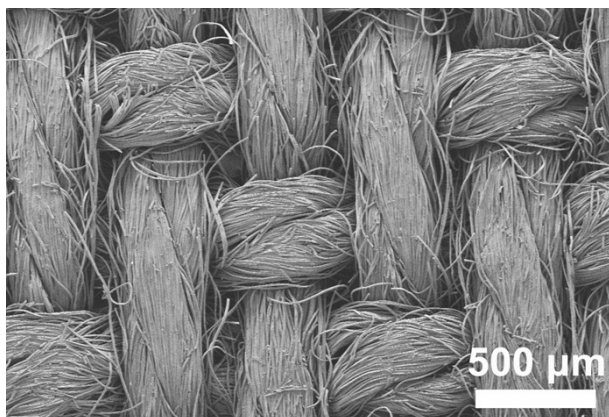

**Fig. S3** Low-magnification SEM image of MoS<sub>2</sub>/CFC.

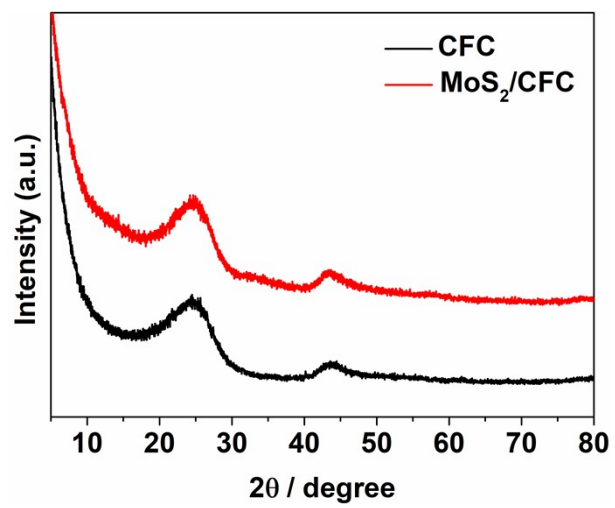

**Fig. S4** XRD patterns of bare CFC and MoS<sub>2</sub>/CFC.

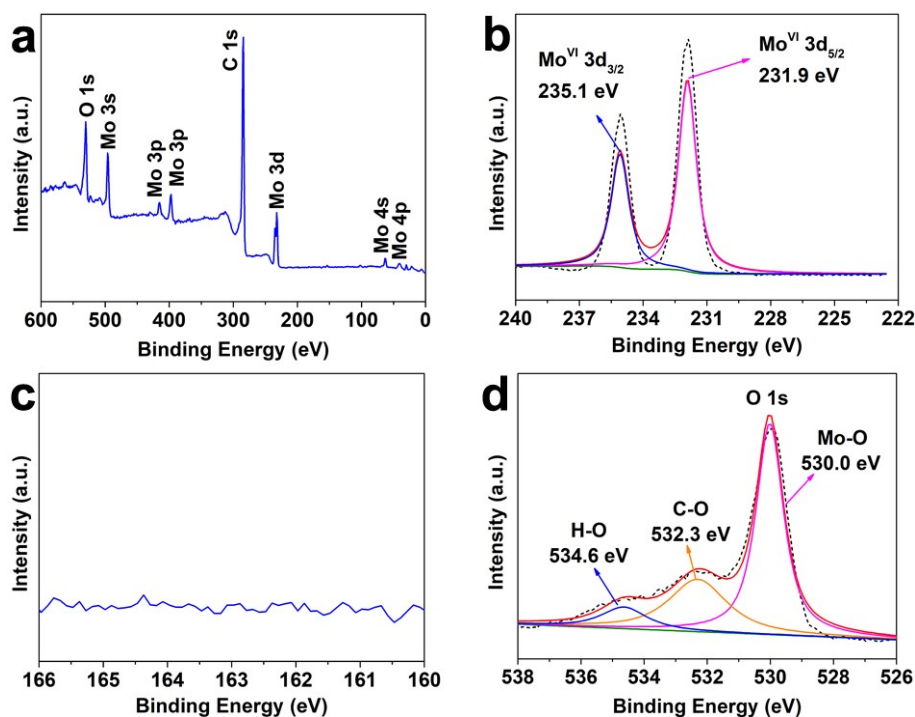

**Fig. S5** (a) Surface survey XPS spectrum of  $\text{Mo}^{6+}$ -adsorbed CFC; High-resolution XPS spectra of (b) Mo 3d, (c) S 2p and (d) O 1s.

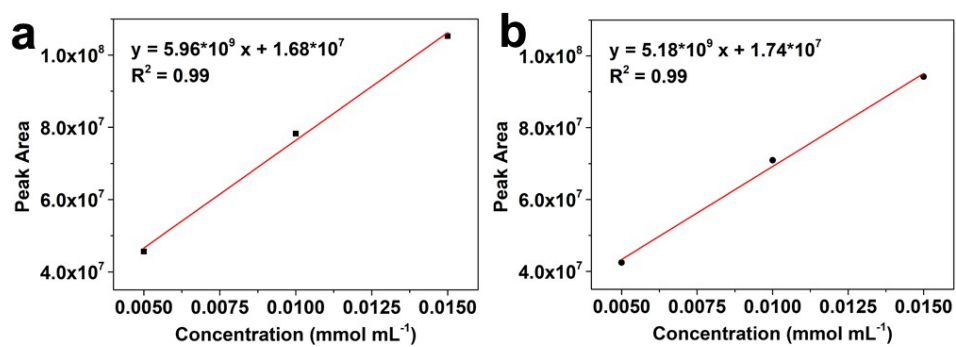

**Fig. S6** Gas chromatograph spectrogram and the corresponding calibration curves of (a) CAL and (b) HCAL.

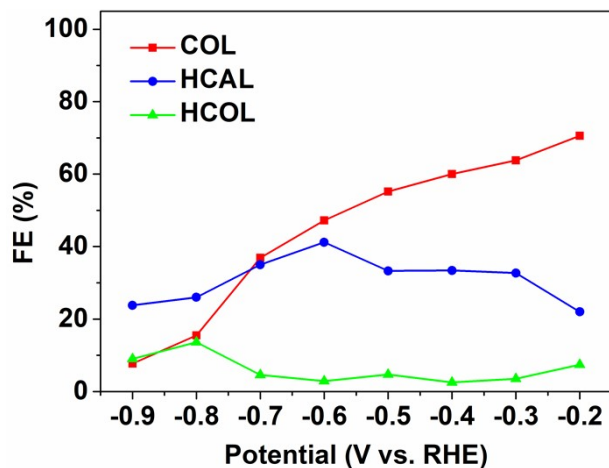

**Fig. S7** The detailed FE values for COL, HCAL and HCOL.

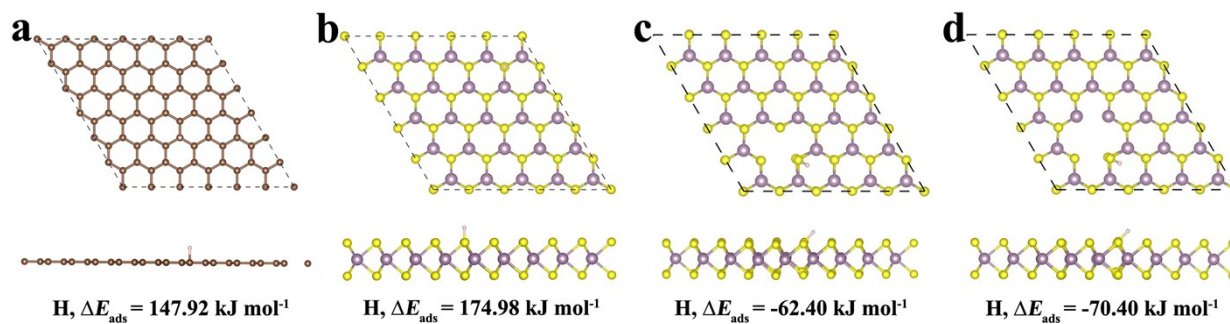

**Fig. S8** Adsorption configurations and energies of H atom over (a) graphite carbon, (b) MoS<sub>2</sub> (002) surface, (c) MoS<sub>2</sub> (002) surface with Mo-vacancy, (d) MoS<sub>2</sub> (002) surface with Mo/S-vacancies (brown sphere: C, white sphere: H, yellow sphere: S, and purple sphere: Mo).

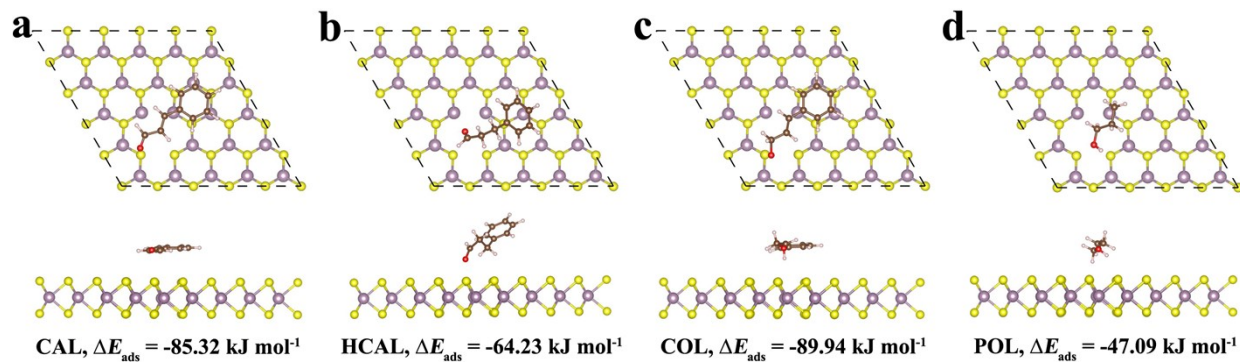

**Fig. S9** Adsorption configurations and energies of different reacting species on MoS<sub>2</sub> (002) surface with Mo/S-vacancies (brown sphere: C, white sphere: H, red sphere: O, yellow sphere: S, and purple sphere: Mo).

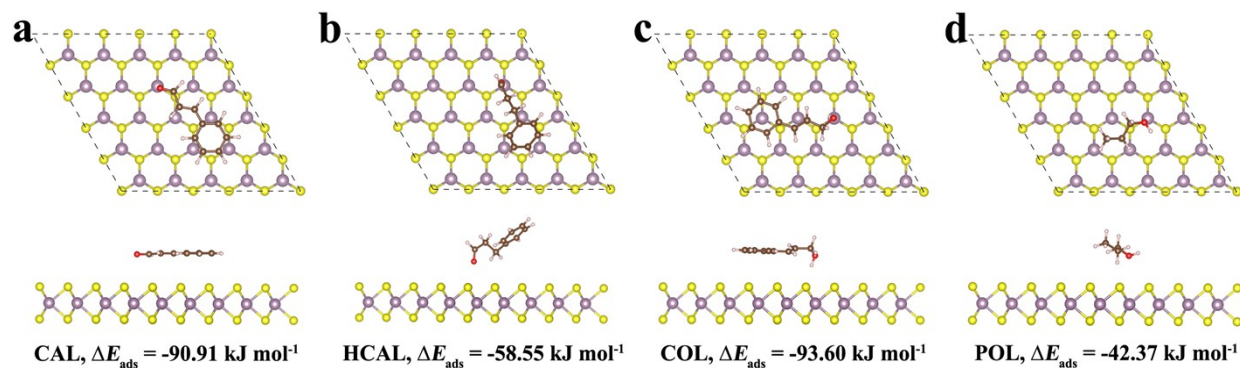

**Fig. S10** Adsorption configurations and energies of different reacting species on bulk MoS<sub>2</sub> (002) surface (brown sphere: C, white sphere: H, red sphere: O, yellow sphere: S, and purple sphere: Mo).



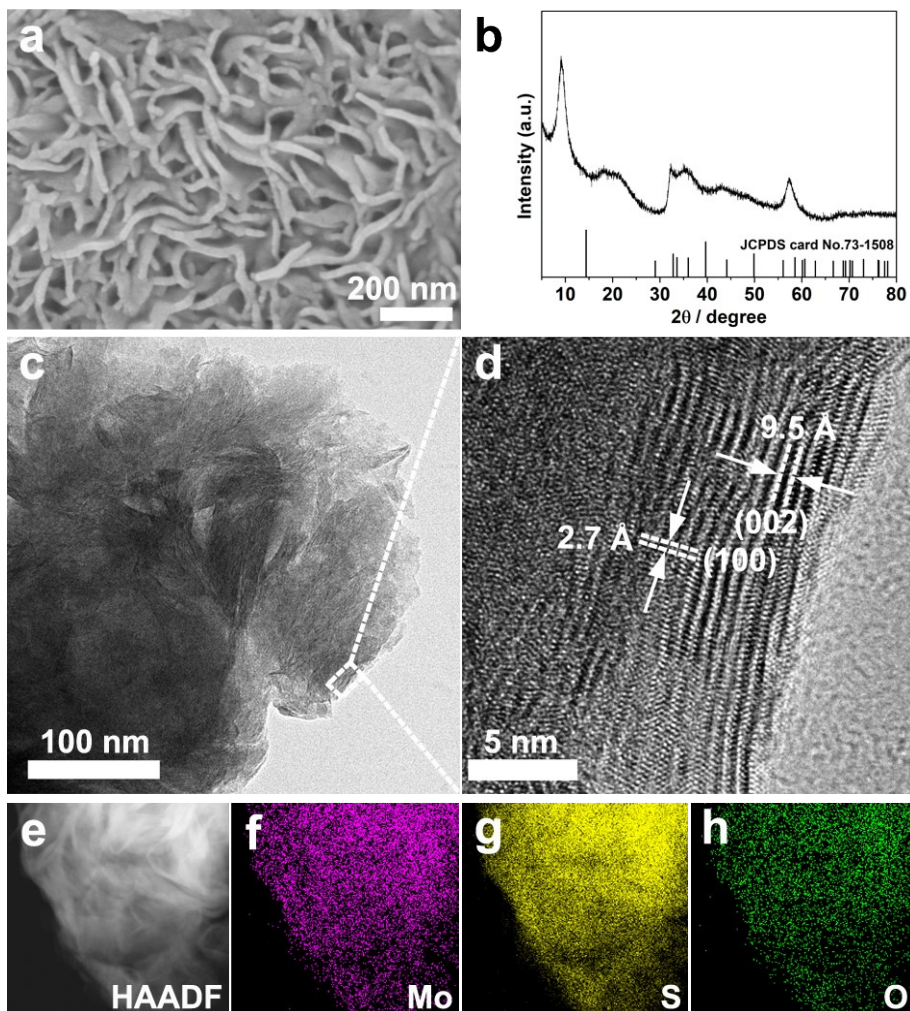

**Fig. S11** Bulk MoS<sub>2</sub>: (a) SEM image; (b) XRD pattern; (c) TEM image; (d) HRTEM image; (e) High-angle annular dark-field scanning transmission electron microscopy (HAADF-STEM) and (f-h) corresponding elemental mapping images.

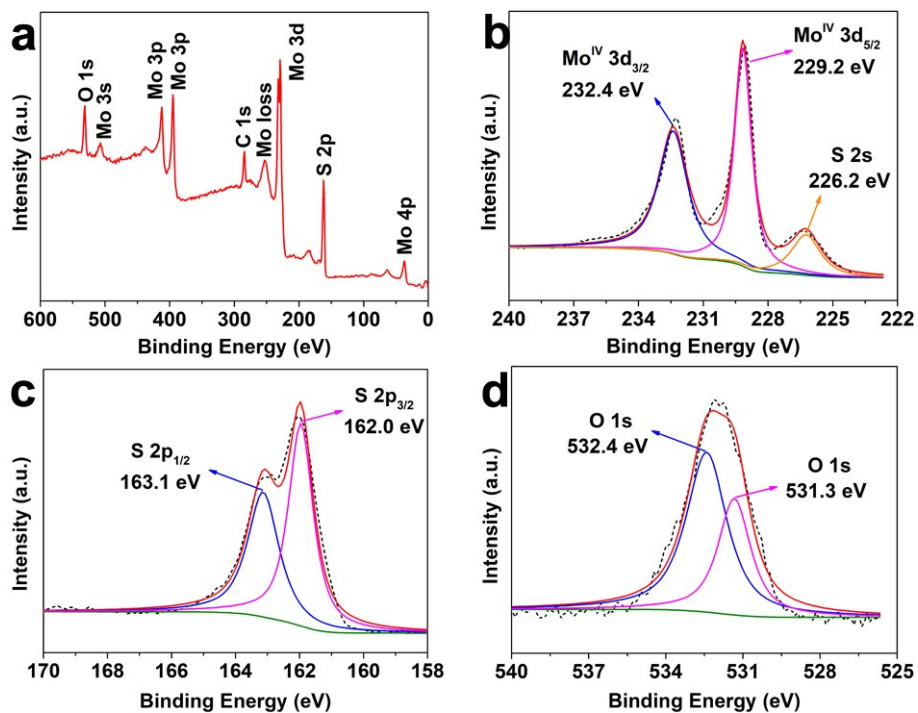

**Fig. S12** Bulk MoS<sub>2</sub>: (a) Surface survey XPS spectrum; High-resolution XPS spectra of (b) Mo 3d, (c) S 2p and (d) O 1s.



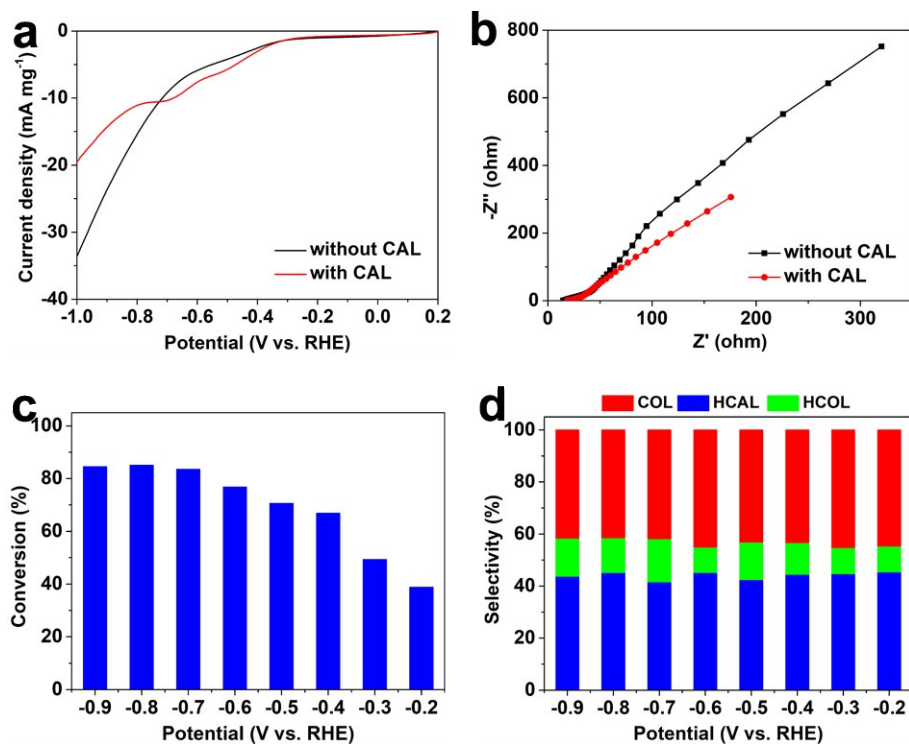

**Fig. S13** (a) LSV curves and (b) EIS spectra of bulk MoS<sub>2</sub> in 0.1 M PBS electrolyte (pH=7.0) with and without CAL; (c) conversion; (d) selectivity.

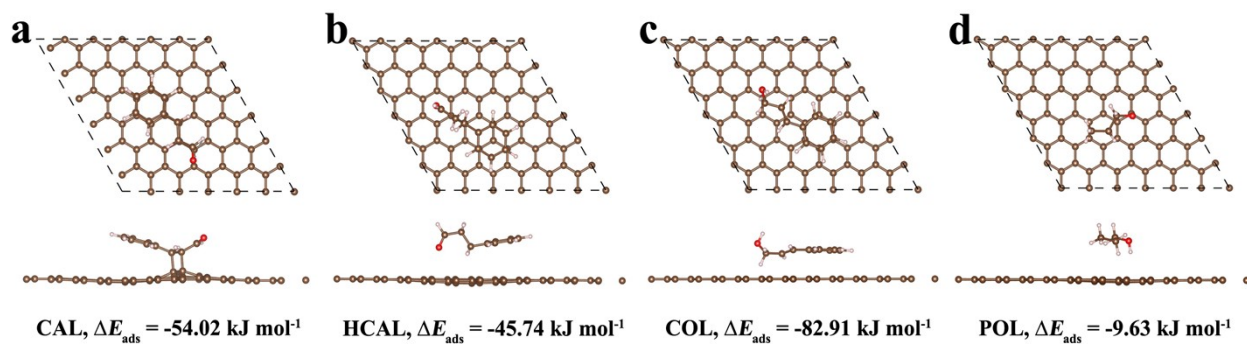

**Fig. S14** Adsorption configurations and energies of different reacting species on graphite carbon (brown sphere: C, white sphere: H, red sphere: O).

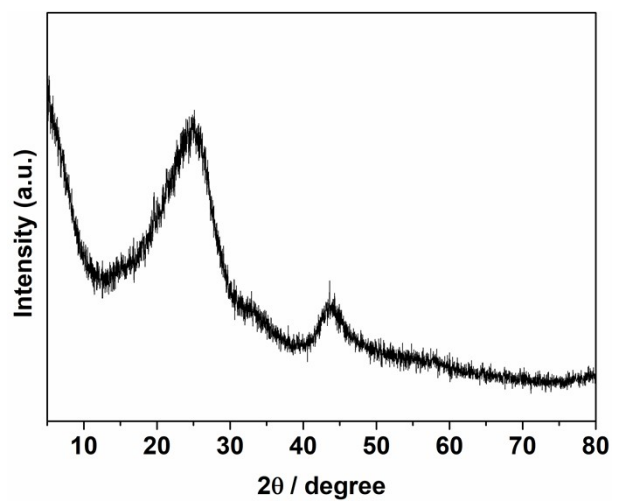

**Fig. S15** XRD pattern of MoS<sub>2</sub>/CFC after ECH measurements.

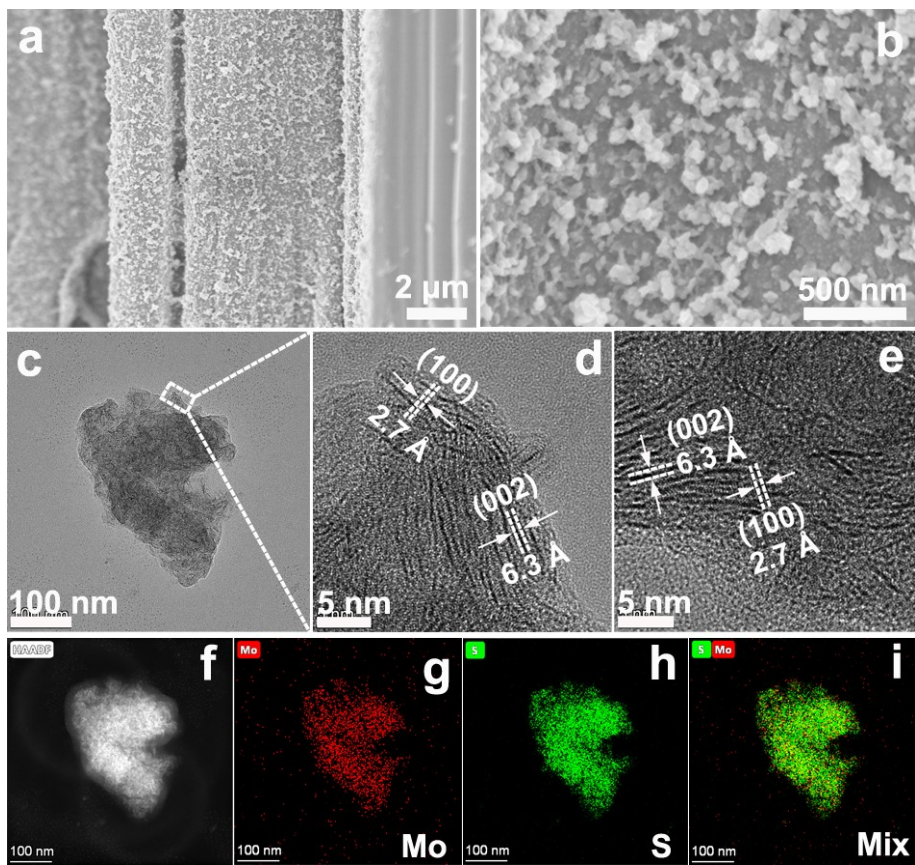

**Fig. S16** MoS<sub>2</sub>/CFC after ECH: (a) Low-magnification SEM image; (b) High-magnification SEM image; (c) TEM image; (d) HRTEM image; (e) High-angle annular dark-field scanning transmission electron microscopy (HAADF-STEM) and (f-i) corresponding elemental mapping images.

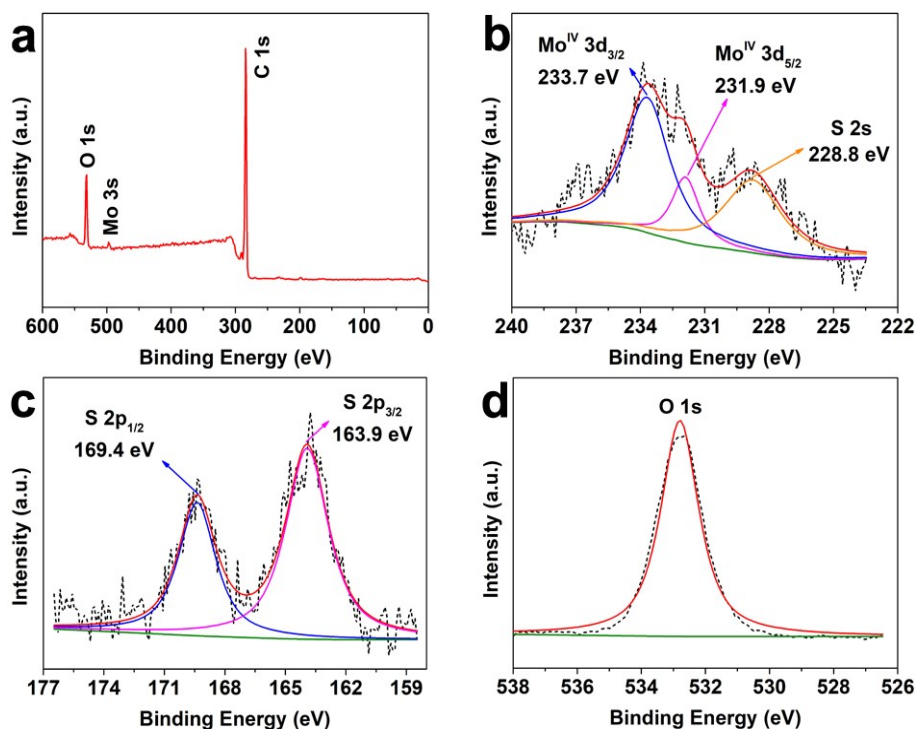

**Fig. S17** MoS<sub>2</sub>/CFC after ECH: (a) Surface survey XPS spectrum; High-resolution XPS spectra of (b) Mo 3d, (c) S 2p and (d) O 1s.

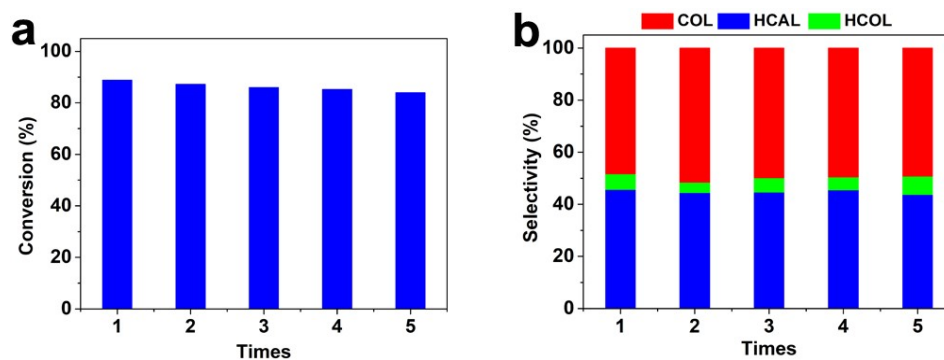

**Fig. S18** The five consecutive cycling tests of MoS<sub>2</sub>/CFC for electrocatalytic CAL hydrogenation under -0.7 V vs. RHE: (a) conversion, (b) selectivity.

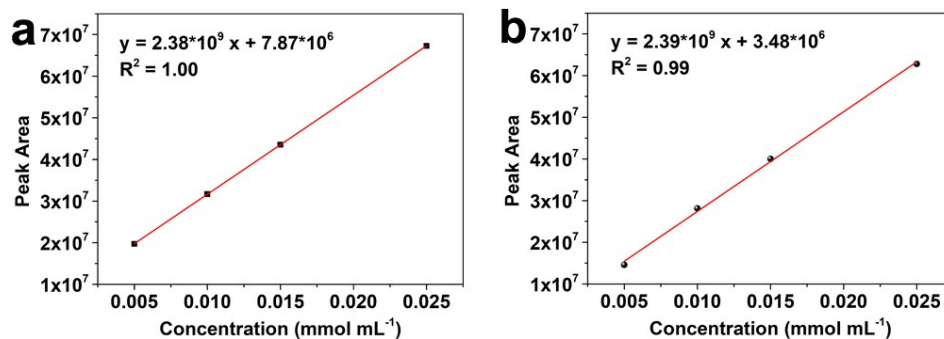

**Fig. S19** Gas chromatograph spectrogram and the corresponding calibration curves of (a) FAL and (b) FOL.

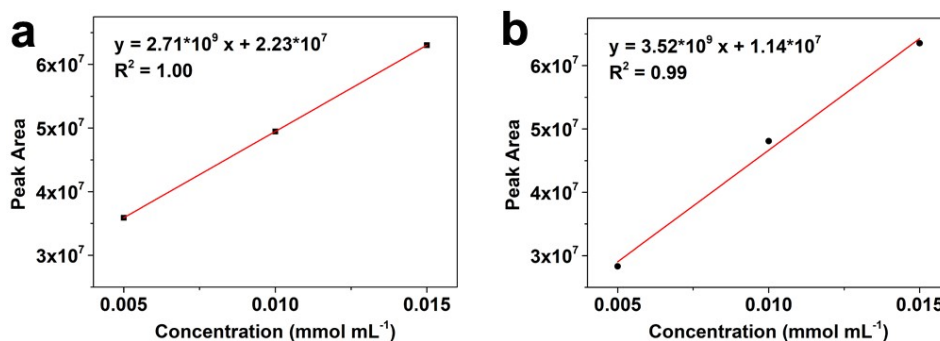

**Fig. S20** Gas chromatograph spectrogram and the corresponding calibration curves of (a) benzaldehyde and (b) benzyl alcohol.

**Table S1** Percentage of Mo and S atoms in different samples by XPS analysis.

| Sample                          | atom% of Mo | atom% of S | Atom ratio of Mo/S |
|---------------------------------|-------------|------------|--------------------|
| defective MoS <sub>2</sub> /CFC | 3.18        | 9.36       | 1:2.94             |
| bulk MoS <sub>2</sub>           | 18.25       | 36.68      | 1:2.01             |

**Table S2** The detailed data of electrocatalytic hydrogenation of cinnamaldehyde (CAL) by the defective MoS<sub>2</sub>/CFC.

| Potential<br>(V vs. RHE) | Reaction time<br>(h) | Conversion<br>(%) | Selectivity (%) |      |      | FE<br>(%) | TOF<br>(mmol mmol <sub>MoS<sub>2</sub></sub> <sup>-1</sup> h <sup>-1</sup> ) |
|--------------------------|----------------------|-------------------|-----------------|------|------|-----------|------------------------------------------------------------------------------|
|                          |                      |                   | HCAL            | COL  | HCOL |           |                                                                              |
| -0.2                     | 5                    | 52.3              | 22.0            | 70.6 | 7.4  | 100.0     | 7.5                                                                          |
| -0.3                     | 5                    | 54.8              | 32.7            | 63.8 | 3.5  | 100.0     | 7.9                                                                          |
| -0.4                     | 5                    | 60.7              | 34.8            | 62.6 | 2.6  | 95.9      | 8.7                                                                          |
| -0.5                     | 5                    | 73.0              | 35.7            | 59.2 | 5.1  | 93.2      | 10.5                                                                         |
| -0.6                     | 5                    | 81.6              | 45.1            | 51.7 | 3.2  | 91.3      | 11.7                                                                         |
| -0.7                     | 5                    | 88.8              | 45.7            | 48.3 | 6.0  | 76.5      | 12.8                                                                         |
| -0.8                     | 5                    | 83.0              | 47.2            | 28.2 | 24.6 | 55.1      | 11.9                                                                         |
| -0.9                     | 5                    | 83.9              | 58.8            | 19.1 | 22.1 | 40.5      | 12.1                                                                         |



**Table S3** The performance comparison of the defective MoS<sub>2</sub>/CFC with the representative reports basing on electrocatalytic CAL selective hydrogenation.

| Catalyst                                                 | Condition                   | Conversion (%) | Selectivity (%) |       |      | Reference |
|----------------------------------------------------------|-----------------------------|----------------|-----------------|-------|------|-----------|
|                                                          |                             |                | HCAL            | COL   | HCOL |           |
| defective MoS <sub>2</sub> /CFC                          | -0.7 V vs. RHE, 5h          | 88.8           | 45.7            | 48.3  | 6.0  | This work |
| Ta <sub>2</sub> O <sub>5</sub> /Ru-4.0-400               | -1.1 V vs. RHE, 5h          | 69.8           | 100             | /     | /    | [1]       |
| RuO <sub>2</sub> -SnO <sub>2</sub> -TiO <sub>2</sub> /Ti | -0.85 V vs. RHE, 5h         | 58.0           | /               | 88.86 | /    | [2]       |
| CoS <sub>2</sub> NCs                                     | -0.9 V vs. RHE, 3.3h        | 90.6           | 91.7            | /     | /    | [3]       |
| CoS <sub>2-x</sub> NCs                                   | -0.9 V vs. RHE, 3.3h        | 92.1           | /               | /     | 93.0 | [3]       |
| Pt-10/C-0.2                                              | 0.05 A                      | 12.0           | 2.5             | 6.0   | 1.0  | [4]       |
| GMP-Pd/NF                                                | 10 mA cm <sup>-2</sup> , 6h | 71.1           | /               | 90.3  | /    | [5]       |
| Pd/CF                                                    | 50 mA cm <sup>-2</sup> , 7h | 96.21          | 19.52           | 57.88 | 8.14 | [6]       |

**Table S4** The detailed data of electrocatalytic hydrogenation of furfural (FAL) by the defective MoS<sub>2</sub>/CFC.

| Potential<br>(V vs. RHE) | Reaction time<br>(h) | Conversion<br>(%) | Selectivity<br>(%) | FE<br>(%) | TOF<br>(mmol mmol <sub>MoS<sub>2</sub></sub> <sup>-1</sup> h <sup>-1</sup> ) |
|--------------------------|----------------------|-------------------|--------------------|-----------|------------------------------------------------------------------------------|
| -0.2                     | 5                    | 25.1              | 100.0              | 60.1      | 3.6                                                                          |
| -0.3                     | 5                    | 28.6              | 100.0              | 34.7      | 4.1                                                                          |
| -0.4                     | 5                    | 36.8              | 100.0              | 24.7      | 5.3                                                                          |
| -0.5                     | 5                    | 45.5              | 100.0              | 17.8      | 6.5                                                                          |
| -0.6                     | 5                    | 47.2              | 100.0              | 20.8      | 6.8                                                                          |
| -0.7                     | 5                    | 83.3              | 100.0              | 25.3      | 12                                                                           |
| -0.8                     | 5                    | 92.6              | 100.0              | 12.4      | 13.3                                                                         |
| -0.9                     | 5                    | 65.4              | 100.0              | 8.9       | 9.4                                                                          |

**Table S5** The detailed data of electrocatalytic hydrogenation of benzaldehyde by the defective MoS<sub>2</sub>/CFC.

| Potential<br>(V vs. RHE) | Reaction time<br>(h) | Conversion<br>(%) | Selectivity<br>(%) | FE<br>(%) | TOF<br>(mmol mmol <sub>MoS<sub>2</sub></sub> <sup>-1</sup> h <sup>-1</sup> ) |
|--------------------------|----------------------|-------------------|--------------------|-----------|------------------------------------------------------------------------------|
| -0.3                     | 5                    | 18.5              | 100.0              | 24.7      | 2.7                                                                          |
| -0.4                     | 5                    | 20                | 100.0              | 20.3      | 2.9                                                                          |
| -0.5                     | 5                    | 27                | 100.0              | 11.4      | 3.9                                                                          |
| -0.6                     | 5                    | 28.3              | 100.0              | 9.6       | 4.1                                                                          |
| -0.7                     | 5                    | 29.4              | 100.0              | 13.4      | 4.2                                                                          |
| -0.8                     | 5                    | 34.5              | 100.0              | 14.3      | 5.0                                                                          |
| -0.9                     | 5                    | 66.7              | 100.0              | 9.4       | 9.6                                                                          |
| -1.0                     | 5                    | 81.7              | 100.0              | 10.1      | 11.8                                                                         |

## Reference

1. T. Wu, H. Meng and R. Dang, Amorphous Ta<sub>2</sub>O<sub>5</sub>-supported Ru as an efficient electrocatalyst for selective hydrogenation of cinnamaldehyde with water as the hydrogen source, *Inorg. Chem. Front.*, 2021, **8**, 4712-4719.
2. X. Huang, L. Zhang, C. Li, L. Tan and Z. Wei, High selective electrochemical hydrogenation of cinnamaldehyde to cinnamyl alcohol on RuO<sub>2</sub>-SnO<sub>2</sub>-TiO<sub>2</sub>/Ti electrode, *ACS Catal.*, 2019, **9**, 11307-11316.
3. S. Han, Y. Shi, C. Wang, C. Liu and B. Zhang, Hollow cobalt sulfide nanocapsules for electrocatalytic selective transfer hydrogenation of cinnamaldehyde with water, *Cell Rep. Phys. Sci.*, 2021, **2**, 100337.
4. M. J. Torres, P. Sánchez, A. de Lucas-Consuegra and A. R. de la Osa, Electrocatalytic hydrogenation of cinnamaldehyde in a PEM cell: the role of sodium hydroxide and platinum loading, *Mol. Catal.*, 2020, **492**, 110936.
5. Y. Gao, A. Kong, M. Peng, Y. Lv, M. Liu, W. Li, J. Zhang and Y. Fu, Tuning electrochemical environment enables unexpected C=O selectivity for cinnamaldehyde hydrogenation over self-standing palladium cathode, *Mol. Catal.*, 2022, **529**, 112536.
6. H. Chen, T. Peng, B. Liang, D. Zhang, G. Lian, C. Yang, Y. Zhang and W. Zhao, Efficient electrocatalytic hydrogenation of cinnamaldehyde to value-added chemicals, *Green Chem.*, 2022, **24**, 3655-3661.
